# Supplementary material for: p53 Immunohistochemistry Patterns Are Surrogate Biomarkers for TP53 Mutations in Gastrointestinal Neuroendocrine Neoplasms
Source: Hindawi journal article supplement (doi:10.1155/2021/2510195), 2021-12-15
Supplement: f1 [file 2510195.f1.pdf]

Supplementary table S1 The optional parameters of the tools in the bioinformatics analysis

| Tools                                               | Optional parameters                                                                                                                                                                                 |
|-----------------------------------------------------|-----------------------------------------------------------------------------------------------------------------------------------------------------------------------------------------------------|
| <b>fastp (v0.20.0)</b>                              | -f 10 -t 0 -F 10 -T 0 -w 8 --length_required 35 -q 15 -u 40 -n 5 -3 1                                                                                                                               |
| <b>BWA mem2(v2.1)</b>                               | mem -Y -M -R "@RG\tID:"..."tSM:"..."tLB:"..."tPU:"..."tPL:"ILLUMINA"                                                                                                                                |
| <b>SAMtools (v1.9)</b>                              | sort --reference hs37d5.fa                                                                                                                                                                          |
| <b>MarkDuplicates</b><br>(packed in GATK 4.1.2.0)   | --VALIDATION_STRINGENCY SILENT<br>--OPTICAL_DUPLICATE_PIXEL_DISTANCE 2500<br>--ASSUME_SORT_ORDER "coordinate"<br>--CLEAR_DT false<br>--CREATE_MD5_FILE true                                         |
| <b>BaseRecalibrator</b><br>(packed in GATK 4.1.2.0) | -R hs37d5.fa<br>--use-original-qualities<br>--known-sites Mills_and_1000G_gold_standard.indels.b37.vcf<br>--known-sites dbsnp_138.b37.del100.vcf.gz<br>--known-sites 1000G_phase1.indels.b37.vcf.gz |
| <b>ApplyBQSR</b><br>(packed in GATK 4.1.2.0)        | -R hs37d5.fa<br>--add-output-sam-program-record<br>--use-original-qualities                                                                                                                         |
| <b>Mutect2</b><br>(packed in GATK 4.1.2.0)          | --germline-resource af-only-gnomad.raw.sites.b37.vcf.gz<br>--af-of-alleles-not-in-resource 0.0000025<br>-A ClippingRankSumTest                                                                      |

Supplementary table S2 The distribution of *TP53* status in 92 GI-NENs

|            | <i>TP53 Mutations</i>    | NET | NECs |
|------------|--------------------------|-----|------|
|            | <b>Nonsense</b>          | 0   | 8    |
| <b>LOF</b> | <b>Frameshift indels</b> | 0   | 4    |
|            | <b>Splicing</b>          | 0   | 5    |
|            | <b>Wild type</b>         | 34  | 4    |
| <b>GOF</b> | <b>Missense</b>          | 1   | 31   |
|            | <b>In-frame indels</b>   | 0   | 5    |

Supplementary table S3 Comparison between the percentage of p53 positive cells and *TP53* mutation status in 92 GI-NEN cases

| Percentage of p53 positive cells (%) | Mutational Analysis |            |          |           |           |          | Total |
|--------------------------------------|---------------------|------------|----------|-----------|-----------|----------|-------|
|                                      | LOF                 |            |          | Wild Type | GOF       |          |       |
|                                      | Nonsense            | Frameshift | Splicing |           | Missense  | In-Frame |       |
| <b>0</b>                             | <b>5</b>            | <b>3</b>   | <b>3</b> | 2         | 0         | 0        | 13    |
| <b>1-10</b>                          | 1                   | 0          | 1        | <b>28</b> | 0         | 0        | 30    |
| <b>11-20</b>                         | 0                   | 0          | 0        | <b>5</b>  | 0         | 0        | 5     |
| <b>21-30</b>                         | 1                   | 0          | 1        | 0         | <b>2</b>  | <b>0</b> | 4     |
| <b>31-40</b>                         | 0                   | 0          | 0        | 0         | <b>0</b>  | <b>0</b> | 0     |
| <b>41-50</b>                         | 0                   | 0          | 0        | 0         | <b>1</b>  | <b>1</b> | 2     |
| <b>51-60</b>                         | 0                   | 0          | 0        | 0         | <b>0</b>  | <b>0</b> | 0     |
| <b>61-70</b>                         | 0                   | 1          | 0        | 1         | <b>1</b>  | <b>0</b> | 3     |
| <b>71-80</b>                         | 0                   | 0          | 0        | 1         | <b>2</b>  | <b>0</b> | 3     |
| <b>81-90</b>                         | 0                   | 0          | 0        | 1         | <b>3</b>  | <b>2</b> | 6     |
| <b>91-100</b>                        | 1                   | 0          | 0        | 0         | <b>23</b> | <b>2</b> | 26    |

Supplementary table S4 The inter-pathologist concordance for p53 IHC patterns in GI-NENs

| Original interpretation | Interpretation from the third pathologist |           |            |            |
|-------------------------|-------------------------------------------|-----------|------------|------------|
|                         | Pattern A                                 | Pattern B | Pattern C1 | Pattern C2 |
| <b>Pattern A</b>        | 13                                        | 0         | 0          | 0          |
| <b>Pattern B</b>        | 1                                         | 34        | 0          | 0          |
| <b>Pattern C1</b>       | 0                                         | 1         | 5          | 0          |
| <b>Pattern C2</b>       | 0                                         | 0         | 0          | 38         |

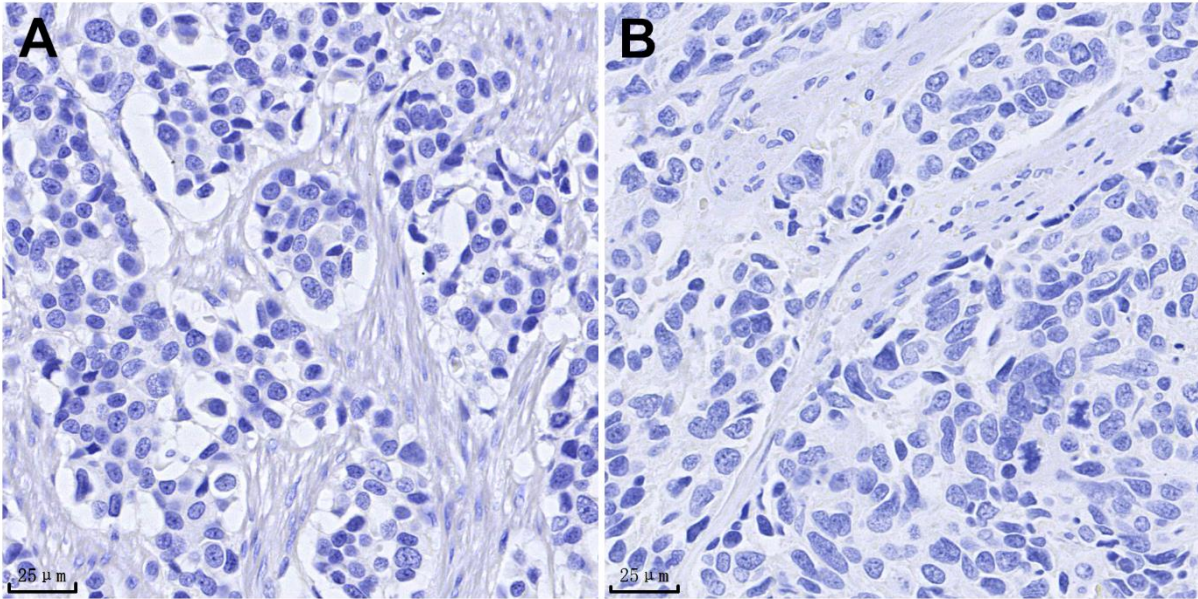

Supplementary figure S1. The examples of uninterpretable cases. p53 expression was completely absent throughout the entire section including both tumor cells and non-tumor internal control cells (40×) in one case with wild-type *TP53* (A) and another case with *TP53* missense mutation (B).
